# Supplementary material for: Assessing Bare Ice Albedo Simulated by MAR over the Greenland Ice Sheet (2000–2021) and Implications for Meltwater Production Estimates
Source: Copernicus journal article supplement (doi:10.5194/egusphere-2022-37), 2022-04-04
Supplement: Supplementary file [file egusphere-2022-37-RC2-supplement.pdf]

# Comments on “Assessing Bare Ice Albedo Simulated by MAR over the Greenland Ice Sheet (2000–2021) and Implications for Meltwater Production Estimates” by Raf Antwerpen et al.

## 1 Summary

The authors assess the performances of the Modèle Atmosphérique Régional (MAR) in simulating Greenland bare ice albedo by comparing MAR results over the period 2000-2021 with albedo and bare ice extent retrievals from MODIS optical imagery. Spatial and temporal similarities and deviations in bare ice extent and bare ice albedo between MAR and MODIS retrievals are first presented and discussed. An energy balance model is then used to parameterize meltwater production and present the consequences of significant deviations between modeled and observed bare ice albedo in runoff estimation.

The authors have presented a well-written and coherent manuscript on a topic and scope that suits well for The Cryosphere. Reporting on and understanding the performances of regional climate models in simulating bare ice processes and their consequences is indeed a key step to move towards an improved representation of this complex but highly important area of the Greenland ice sheet. By quantifying the deviations between MAR simulations and spaceborne observations, the authors make an essential contribution to the basis of an improved projection of the Greenland ice sheet’s future evolution.

Along with several minor comments, I nevertheless here point out a few substantial concerns that are in my opinion essential to address before publication. Several choices made by the authors are I think not motivated and discussed enough to give the reader a clear picture about their limitations and potential implications. While I mostly support those choices, it is currently hard to get a sense about the magnitude of their influence on the conclusions. My main concerns are about the choice of method for bare ice mapping with MODIS data, the use of a spatially- and temporally-averaged ELA and a 1999-2002 static ice mask and DEM. These different points are further discussed in the “General comments” section below.

## 2 General comments

The threshold of 0.6 applied to MODIS band 2 has been determined by Shimada et al, 2016 using one single satellite image analyzed over West Greenland. This threshold is here applied by the authors to data covering the entire ice sheet from 2000 to 2021 (with a focus below 70°N for runoff estimations). It is therefore important to discuss a potential lack of representativity of this threshold at the ice sheet scale, and present potential associated limitations. In this way, important to better understand the sensitivity of the results to this threshold: does a small variation in this value have a significant impact on the results presented here? And if so, to which extent?

In this direction, and as an example and illustration, I used MOD10A1 (1km resolution) data I had locally on hand for the period 2000-2019 and applied the bare-ice-onset albedo value of 0.565 determined in Wehrlé et al. (2021) to quantify the daily bare ice extent. In Wehrlé et al. (2021), the seasonal evolution of bare ice albedo across Greenland has been studied using data from 20 automatic weather stations (105 station years). A bare-ice albedo at ice-ablation onset of 0.565 -used here- has been determined (and called bare-ice-onset albedo). The MOD10A1 data used here is gapless, a given pixel value is fixed to the last cloud-free retrieval until the next cloud-free update is available. The static GIMP mask has been used. The data and method used here are different to those presented in this manuscript but both exercises quantify the same variable and therefore, should ideally show low deviations. As visible in the figure below, large variations are shown compared to MOD09GA with the Shimada et al 2016 threshold, and the bare ice area computed here is in much better agreement with MAR. Making the assumption MAR is underestimating runoff over the whole ice sheet (although only shown below 70°N in this study), one could

suggest this pattern is mainly due to MAR’s incapacity to model low-enough bare ice albedo values (Figure 5b of this study) and not because of low performances in bare ice classification. However, a spatial analysis would be needed to make sure that, more than having similar magnitude, both bare ice extents actually correspond to similar areas.

While MAR uncertainty and potential sources of errors are widely discussed which adds a lot of value to the conclusions drawn in this manuscript, there is currently no similar considerations on the observation side of the study. The example presented here supports the real need for a substantial discussion of the observation retrievals and their sensitivity to the methods applied.

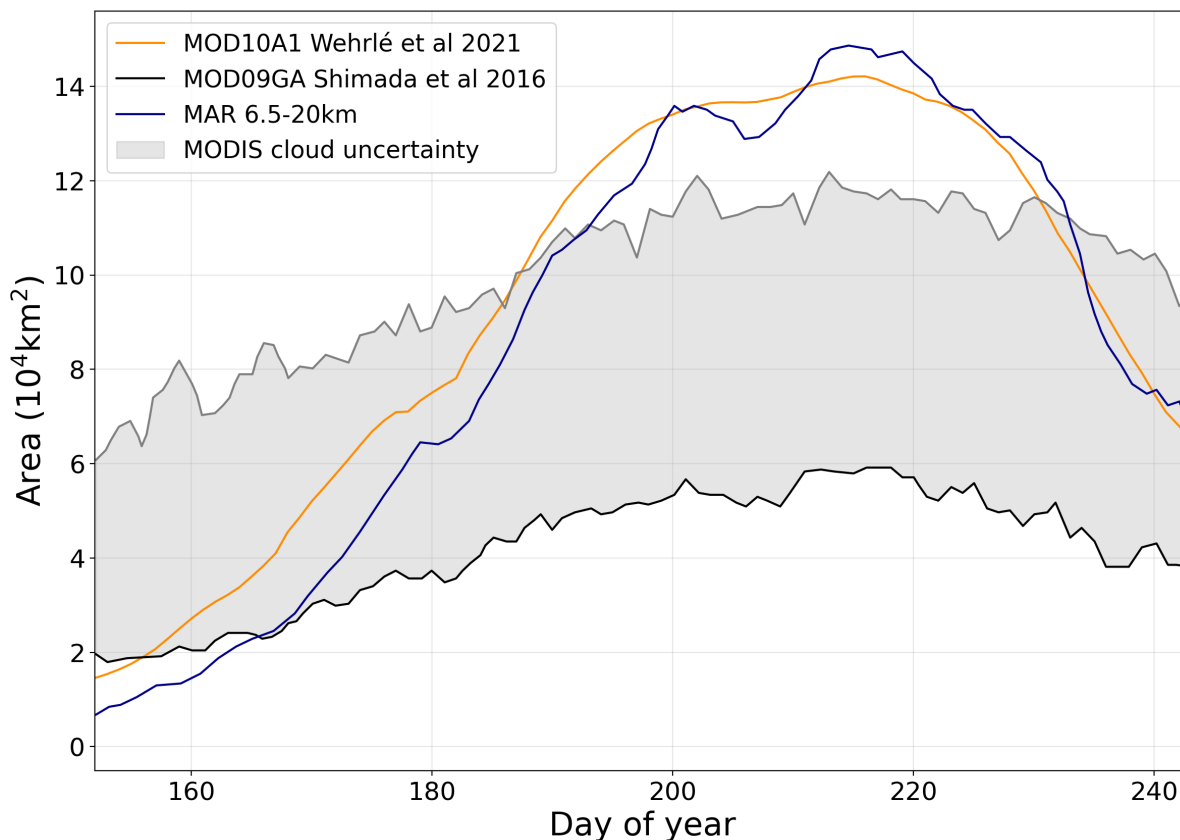

Figure 1: Bare ice area determined from MOD10A1 (2000-2019) and a 0.565 threshold on albedo (Wehrlé et al., 2021) on top of Figure 3 presented in this manuscript. Data has been coarsely digitized. The MAR curve has been digitized as an approximation of MAR 6.5km-20km.

As a first step in the mapping of bare ice, the bare ice extent is bounded to the area below the spatially and temporally-averaged ELA to exclude “sporadically high ablation cell detections”. How important are these cells? Do they correspond to <1% of the total bare ice extent or more? Addressing those questions would be necessary to get a better sense about the sensitivity of the results to the use of the long-term average ELA (more details in detailed comment P7 L13-14).

The GIMP ice mask and DEM used in different sections of the study to assess results over the 2000-2021 time period have been created from a combination of Landsat-7 and RADARSAT-1 imagery acquired between 1999 and 2002. The ice sheet evolved significantly in 20 years. It is important to discuss if the use of a static ice mask and DEM has an important impact on the different results it is related to, in order to, here again, be able to get the full picture about the sensitivity of the conclusions to the methods used and choices made.

### 3 Detailed comments

P2 L5: suggest replacing “will likely continue to be so”, e.g. for “will likely remain so”.

P2 L14-15: I find the distinction between “surface” and “volume” changes a bit confusing as surface losses also consist in changes in volume, just like at the calving front. I suggest replacing “volume losses” for “frontal losses at the terminus of outlet glaciers”.

P2 L27: The GBI acronym should not be introduced if not used afterwards.

P3 L1-L2: this sentence while clear is very long, I suggest breaking it in two shorter sentences, e.g. by starting a second sentence instead of “which, in turn” (P2 L30).

P3 L11: This value corresponds to a freshly exposed bare ice at the beginning of the melt season and can decrease by several tens in the next months. As a range of values is provided for snow, I suggest doing so for bare ice too. In Wehrlé et al. (2021) we determined a bare-ice albedo at ice-ablation onset (that we called bare-ice-onset albedo) of 0.565, and a mean minus one standard deviation as low as 0.314, 36 days after bare-ice onset. A range of 0.57-0.31 could therefore be used. Simply specifying the value presented here is at bare-ice onset would also make it more clear.

P3 L13: “encompasses only a small fraction of the GrIS”: since a value for the runoff is give, it would be interesting to have an average value for the bare ice area ratio, too.

P3 L18: It could be interesting to give values for the variability of bare ice albedo here, or at least at some point in the introduction. The values reported in Wehrlé et al. (2021) could be used.

P4 L7: I think Stibal et al. (2017) is also important to include, they show ice algae enhance bare ice darkening.

P5 L27: The 70°N restriction should be made clearer. This is not completely clear to me, but as I understand it data above 70°N is included for bare ice extent and disregarded for bare ice albedo and runoff comparisons. This should be clearly stated here.

P7 L13-14: For clarity and to help the reader I suggest adding that, because this is a conservative estimate, it consists in a first simplified estimate of the bare extent which is further refined by the two conditions on snow depth and average density. See next comment.

P7 L13-14: This is an efficient masking for melt years above or close to average, however for cold years part of the bare ice area is probably disregarded right after this first step as the ELA might be higher than the long-term average. I suppose this is not influencing the results a lot, but this should be stated and discussed. This is linked to the first general comment. The influence of the long-term average ELA on the mapping of individual years and its potential limitations are important to further discuss.

P7 L19: suggest explaining very shortly why four different scores are used, why this is needed, and how different they are from each other. I suppose most of the cryosphere community is not necessarily familiar with forecast verification.

P8 L1: I think this statement should be made stronger. Every year, large areas with albedo values below 0.5 are observed. Based on the analysis in Wehrlé et al. (2021), the average albedo from the 20 stations included in the study is below 0.5 for more than a month during the melt season. The surface albedo dropping below 0.5 over the summer can therefore be considered as a common event across the bare ice area.

P8 L21: I suggest adding mean bias and RMSE/RMSD here. A qualitative assessment is given in the next sentence but adding the associated numbers would make the point clearer.

Figure 1: I suggest having the point cloud density as a colormap (instead of black) to get a better sense about the distribution especially at low values where the high densities are saturated.

Figure 2: Non-zero average bare ice days so high in altitude at high latitude (e.g. in the North West) is surprising to me. E.g. on Figure 3 of Wehrlé et al. (2021) (Sentinel-3 data), even for the high melt year 2019, albedo is still high above 0.5/0.6 in these areas. The authors describe this pattern very shortly, but I think the MODIS retrievals alone in those areas deserve a couple more sentences, where I suggest comparing qualitatively to other studies.

P12 L12-13: I suggest reformulating this sentence by starting with the second part, e.g. : “MAR respectively under/overestimating snow melt in colder/warmer years indicates it could be too sensitive to temperature”

P12 L15-16: The authors explain the deviations in average BIE between MODIS retrievals and MAR “stem from the inclusion of 2021 data” within a 20 year data sets which I was a bit surprised about. Indeed, on our side, we haven’t detected any major issues with bare ice area retrievals in 2021 using the threshold from Wehrlé et al. (2021) and Sentinel-3 data. The deviations in 2021 BIE retrievals must be very high for the inclusion of the equivalent of ~5% of the data set size to explain relatively important differences in average BIE. I think a quantification of the BIE differences in 2021 should be included and shortly discussed.

P12 L25: The choice of the threshold on MODIS band 2 might also partly explain this pattern.

P13 L1: Suggest replacing ”eager” e.g. for “overestimates firn transformation into bare ice”

Figure 4: I suggest adding a panel for the difference between MODIS and MAR results as in Figure 2. MAR bare ice albedo is almost constant, but this would directly make the range of deviation available to the reader.

Figure 5: The sequential blue colormap used in Figure 3 is readable because the order of the curves follows the sequence. However in Figure 5, because the curves are crossing each other, it is getting hard to link them easily to their respective resolutions. Since there is only 4 curves, I suggest using distinct colors.

P16 L15: two times “only”, one should be deleted.

P16 L25: suggest adding an average ratio/difference compared to second largest contributor.

P16 L29: suggest adding a range of values.

Figure 6: suggest plotting the data as lines and dots (‘o’ e.g. in python). The bars make the visual quite heavy to look at and especially in the case of b), makes the small values close to zero hard to distinguish.

Figure 7: Including September would be interesting to see where is the true maximum of this seasonal trend. Currently, the observed maximum is obtained at the very end of the study period. Interesting patterns -and potentially the highest ratios- might therefore be missed.

P19 L20: suggest including “in central West Greenland” to make it completely clear.

P19 L21-22: I suppose the authors mean South West Greenland by “in the southwest”, and not in the southwest of the region of interest (which would be near Greenland’s southern tip), as the lowest values on the West coast are determined at the latitude of Disko Island. This was initially misleading to me, I suggest specifying the scale.

P20 L15 P21 L1: This is the kind of thoughts and limitation discussion that I think is needed to include for the spaceborne observations, more specifically for the use of the threshold from Shimada et al, 2016. See general comments.

P21 L10: This is where the uncertainty, or a least the sensitivity of the results on bare ice mapping method could be discussed. It should even deserve a whole paragraph in the discussion in my opinion.

P21 L11-18: Part of the results are not limited below this 70°N limit. As pointed out in an earlier comment, I think this should be made clearer. Whenever the 70°N restriction is mentioned, it is currently presented as if it was applied to any results reported here, but this is not the case.

## References

- Stibal, M., Box, J. E., Cameron, K. A., Langen, P. L., Yallop, M. L., Mottram, R. H., Khan, A. L., Molotch, N. P., Christmas, N. A. M., Calì Quaglia, F., Remias, D., Smeets, C. J. P. P., Broeke, M. R., Ryan, J. C., Hubbard, A., Tranter, M., As, D., and Ahlstrøm, A. P.: Algae Drive Enhanced Darkening of Bare Ice on the Greenland Ice Sheet, *Geophysical Research Letters*, 44, 11,463–11,471, <https://doi.org/10.1002/2017gl075958>, 2017.
- Wehrlé, A., Box, J. E., Niwano, M., Anesio, A. M., and Fausto, R. S.: Greenland bare-ice albedo from PROMICE automatic weather station measurements and Sentinel-3 satellite observations, *GEUS Bulletin*, 47, <https://doi.org/10.34194/geusb.v47.5284>, 2021.
